1 **Intratumor bacteria is associated with prognosis in clear-cell renal cell carcinoma**

2 *Running title: ITB predicts survival in ccRCC*

3 Yuqing Li, M.D.<sup>1#</sup>, Dengwei Zhang, Ph.D.<sup>2,3#</sup>, Linyi Tan, M.D.<sup>1</sup>, Junyao Xu, M.D.<sup>4</sup>, Ting Guo,  
4 M.D.<sup>5</sup>, Yang Sun, Ph.D.<sup>6</sup>, Rui Zhang, Ph.D.<sup>7</sup>, Yao Cheng, Ph.D.<sup>7</sup>, Haowen Jiang, M.D.<sup>1\*</sup>, Wei  
5 Zhai, M.D.<sup>4\*</sup>, Yong-xin Li, Ph.D.<sup>2,3\*</sup> and Chenchen Feng, M.D.<sup>1\*</sup>

6 <sup>1</sup>Department of Urology, Huashan Hospital, Fudan University, Shanghai 200040, China

7 <sup>2</sup>Department of Chemistry and The Swire Institute of Marine Science, The University of Hong  
8 Kong, Pokfulam Road, Hong Kong SAR, China.

9 <sup>3</sup>Southern Marine Science and Engineering Guangdong Laboratory (Guangzhou), Guangzhou,  
10 China

11 <sup>4</sup>State Key Laboratory of Oncogenes and Related Genes, Department of Urology, Renji  
12 Hospital, School of Medicine, Shanghai Jiao Tong University, Shanghai 200127, China

13 <sup>5</sup>Department of Gynecology, Obstetrics and Gynecology Hospital of Fudan University,  
14 Shanghai 200000, China

15 <sup>6</sup> Cancer Institute, Xuzhou Medical University, 209 Tongshan Road, Xuzhou, Jiangsu ,  
16 221004, China

17 <sup>7</sup>Shanghai KR Pharmtech, Inc., Ltd, Shanghai, China

18 #Equal contributors

19 \*To whom correspondence may be addressed.

20 Emails: urology\_hs@163.com (HJ); jacky\_zw2002@hotmail.com (WZ); yxpli@hku.hk  
21 (YxL); fengchenchen@fudan.edu.cn (CF)

22 **Word count: 5265**

23

24

**NOTE: This preprint reports new research that has not been certified by peer review and should not be used to guide clinical practice.**

25 **ABSTRACT**

26 **Background**

27 Intratumor bacteria (ITB) plays a role in various cancer types. Its role in clear-cell renal cell  
28 carcinoma (ccRCC) remains elusive due to small sample size and inadequate decontamination  
29 in relevant studies.

30 **Objective**

31 To establish common and reproducible ITB-associated biomarkers in ccRCC.

32 **Design, setting, and participants**

33 This retrospective study comprised seven bulk RNA sequencing datasets from six publicly  
34 available cohorts and one in-house Chinese cohort (Renji), one 16S rRNA sequencing dataset  
35 from an original Chinese cohort (Huashan), and one publicly available single-cell RNA  
36 sequencing dataset. All of these datasets included ccRCC cases.

37 **Outcome measurements and statistical analysis**

38 Composition was presented by relative abundance. Overall and progression-free survival  
39 were primary outcomes profiled by putative ITB load and risk score, respectively. Potential  
40 host interaction was exploratorily analyzed using gene set enrichment analysis and Sparse CCA.

41 **Results and limitations**

42 Nine cohorts encompassing a total of 1049 ccRCC cases and 130 paired normal tissues were  
43 initially analyzed and underwent decontamination. Surprisingly, neither diversity nor  
44 composition was differentially distributed between normal and cancer tissue. High putative  
45 bacterial load was associated with better overall survival. Notably, a 7-genera dichotomized  
46 ITB risk score was indicative of overall survival and a 13-genera dichotomized ITB risk score  
47 was predictive of progression-free survival, respectively. *Actinomyces*, *Rothia* and  
48 *Bifidobacterium* showed a protective role while *Exiguobacterium* was a risk factor. A limitation  
49 is lack of causation analyses.

50 **Conclusions**

51 ITB exists in ccRCC. High ITB loads and ITB-risk score predicts better ccRCC survival  
52 regardless of sequencing tech, sample processing or racial disparity.

53

54 **KEY WORDS** Clear-cell renal cell carcinoma; Intratumor bacteria; Biomarker; Prognosis

55

56 **Patient Summary**

57 In this report, we explored the role of intratumor bacteria (ITB) in renal clear-cell carcinoma  
58 (ccRCC) in patients with different race and sequencing platforms. Putative ITB load and a 7-  
59 genera ITB risk score were associated with overall survival. A 13-genera ITB risk score was  
60 predictive of progression-free survival. We conclude that certain ITB features are universally  
61 pathogenic to ccRCC.

62

## 63 INTRODUCTION

64 Intratumor microorganisms, especially intratumor bacteria (ITB) signature has shown  
65 prognostic effect in a variety of cancer types including gastric cancer<sup>1</sup>, colorectal cancer<sup>2</sup>,  
66 hepatocellular cancer<sup>3</sup>, etc., establishing microbiome as a novel omics or “second genome” of  
67 cancer<sup>4</sup>. However, ITB may vary to vast extents that renders intratumor microbe findings in  
68 some cases, hardly reproducible<sup>5</sup>. Amongst all confounders, biomass of subject<sup>6,7</sup>, race<sup>8,9</sup>,  
69 sequencing tech<sup>10</sup>, and contamination<sup>11</sup> play the most pivotal roles.

70 Despite the pitfalls present in ITB studies, true bacterial signatures could be still identified  
71 by imperfect sequencing technologies and decontamination processes, which has been  
72 demonstrated through experimental validation<sup>12,13</sup>. Furthermore, when consistent findings  
73 emerge from multiple cohorts, the influence of these pitfalls can be minimized, leading to more  
74 reliable and robust conclusions.

75 Clear-cell renal cell carcinoma (ccRCC) is the most common type of malignancy in kidney  
76 that is conventionally accepted as sterile organ and ccRCC is expected to harbor a low biomass  
77 of ITB. To date, the existing literature on ITB in ccRCC is limited to three full papers<sup>14-16</sup> and  
78 one meeting proceeding<sup>17</sup>. These studies suffer from small sample sizes, lack of racial diversity,  
79 use of a single sequencing technology, and inadequate decontamination process. Consequently,  
80 the precise composition and significance of ITB in ccRCC remain elusive. Therefore, a multi-  
81 cohort study focusing on ccRCC is urgently required.

82 While we highly concur that ITB exists in most, if not all solid tumors including ccRCC,  
83 we aim to answer whether common ITB composition exists in ccRCC and whether ITB  
84 signature is prognostic, regardless of demographic, racial and sequencing differences. To  
85 achieve this, we incorporated various reports on decontamination and multiple ccRCC cohorts  
86 encompassing over 1000 cases that vary in region, race, batch, sequencing tech, etc. We aim

87 to identify inherent ITB signatures and explore its prognostication in ccRCC in the current  
88 study.

## 89 **METHODS**

### 90 **Study Population**

91 For 16S rRNA sequencing, we retrospectively collected the 217 tumor and 27 normal  
92 samples from 217 patients histologically diagnosed clear cell renal carcinoma who underwent  
93 partial or radical nephrectomy in Huashan hospital (Shanghai, China) between May 2013 and  
94 Oct 2022 under reasonable inclusion criteria (**Figure 1**). The samples were formalin-fixed and  
95 paraffin-embedded. We also included 10 negative controls using sliced paraffin from the  
96 margin of the block, sampling paraffin only without tissue. Tumor stages were stratified  
97 according to the 8th American Joint Committee on Cancer staging system (AJCC)<sup>18</sup> No  
98 subjects received preoperative treatments, including immunotherapies or molecular targeted  
99 therapies.

100 Six cohorts with the RNA-Seq data available were included in our study.  
101 EGAD00001000597<sup>19</sup> as an integrated molecular study of ccRCC and consists of 100 tumor  
102 samples. EGAD00001006029 (CheckMate 025; NCT01668784)<sup>20</sup> was a prospective clinical  
103 trials of the anti-PD-1 antibody nivolumab in advanced clear cell renal cell carcinoma, and 53  
104 FFPE tumor tissues were obtained prior to initial therapy for patients enrolled in this study,  
105 including 15 patients with the objective response record of immunotherapy. Data from above  
106 two datasets (EGAD00001000597 and EGAD00001006029) were requested from the principal  
107 strictly via European Genome-phenome Archive (EGA, <https://ega-archive.org/>) according to  
108 the clinical data transfer agreement. GSE102101<sup>21</sup>, GSE126964<sup>22</sup>, GSE151419<sup>23</sup> were studies  
109 concerning on the renal cell carcinoma by organizations located in Singapore, China and  
110 Poland, respectively, and the raw sequencing data of tumor and paired normal samples were  
111 downloaded from the gene expression omnibus (GEO) data repository  
112 (<https://www.ncbi.nlm.nih.gov/geo/>). Besides, 27 fresh tumor samples with RNA sequencing  
113 were supplied by the Renji hospital (Shanghai, China).

114 TCGA was a cancer genomics program which molecularly characterized primary cancer and  
115 matched normal samples including clear cell renal cell carcinoma (KIRC). However, due to the  
116 limit of access to the level 1 or 2 data of TCGA hosted at the Genome Data Commons (GDC)  
117 website, the microbiome data processed by Poore et al.<sup>24</sup> and by Salzberg et al.<sup>25</sup>  
118 respectively were directly adopted for downstream bioinformatic analysis in this study. Poore  
119 et al. derived the microbiome data from both WGS and RNA-Seq data, and we used the  
120 normalized and batch effect-corrected data of 532 tumor and 72 paired normal samples. The  
121 author performed decontamination in several degrees and got 5 microbial communities  
122 including data with non-contamination removed (NR), data with likely contaminants removed  
123 (LR), data with putative contaminants removed (PR), data with contaminants removed by  
124 sequencing “plate–center” combinations (CR), and data with mostly stringent filtering (SR).  
125 Salzberg et al. also used the TCGA data but only took WGS data into consideration and shared  
126 us with the data including 40 tumor and 35 paired normal samples. Demographics of all cohorts  
127 were demonstrated in **Table 1**.

#### 128 **16S rRNA gene amplicon sequencing**

129 In preparation for the 16S rRNA gene sequencing, samples were sectioned from the paraffin-embedded  
130 tissue blocks, which accepted quality testing, purification and nested amplification. To meet the requirement  
131 of sufficient DNA for sequencing, the amplified products were detected by DNA electrophoresis, and the  
132 eligible samples were kept for further study. 16S rRNA gene sequencing was conducted at the Nonogene  
133 Co., Ltd. In brief, genomic DNA was extracted from the tissue samples using the CTAB/SDS method. The  
134 16S rDNA V4 region was amplified through PCR employing a primer pair (515F: 5’-  
135 GTGCCAGCMGCCGCGGTAA-3’ and 806R: 5’-GGACTACHVGGGTWTCTAAT-3’) with a barcode.  
136 Sequencing libraries were prepared using the TruSeq® DNA PCR-Free Sample Preparation Kit (Illumina,  
137 USA) following the manufacturer's instructions. The libraries were subsequently sequenced on the Illumina  
138 NovaSeq platform, yielding 250 bp paired-end reads.

#### 139 **16S rRNA sequencing data processing and analysis**

140 The raw sequencing data of 16S rRNA in FASTQ format underwent processing with QIIME 2 version

141 2023.2. Quality filtering, denoising, and chimera removal were performed using DADA2, resulting in high-  
142 quality sequences that were assigned to amplicon sequence variants (ASVs). The feature table was  
143 constructed using these ASVs, and taxonomic information was annotated using a Naive Bayes classifier  
144 trained with the SILVA 138 SSURef NR99 database. ASVs that could not be confidently assigned at the  
145 phylum level, as well as non-bacterial ASVs, were excluded from further analysis.

146 To minimize the potential impact of contaminants, we employed a previously established decontamination  
147 process. This involved three steps: Firstly, we used the `isNotContaminant` function in the "decontam"  
148 algorithm (ref) to identify possible contaminants. This prediction was based on the difference in ASV  
149 prevalence between FFPE samples and tissue samples. Secondly, ASVs with a relative abundance greater  
150 than 0.5% in the FFPE samples were removed. Lastly, ASVs that appeared in less than 5% of the tissue  
151 samples were further eliminated to avoid contingency. Only ASVs that met these criteria were retained for  
152 downstream analysis.

### 153 **Bulk RNA sequencing data processing**

154 Raw RNA sequencing data from tissue samples obtained from six cohorts were acquired online. Sequencing  
155 reads were quality-controlled using `fastp v0.21.1`, with parameters “-l 50 -5 3 -3 3”. Filtered reads that were  
156 shorter than 50 bp were discarded. To quantify human gene expression, the clean reads were aligned to the  
157 human reference genome, GRCh38.p13, available in the GENCODE database using `HISAT2 v2.2.1`. The  
158 gene expression values were quantified in transcripts per million (TPM) using `StringTie v2.2.1`.

159 For profiling the intratumor bacteria from bulk RNA-Seq data, clean reads were initially aligned against an  
160 indexed database to remove host or contaminant reads. This alignment was performed using `bowtie2 v 2.4.5`  
161 with a “--very-sensitive” model. The indexed database included 9 mammalian genomes (hg38, felCat9,  
162 canFam6, mm39, rn7, rheMac10, susScr11, galGal6, bosTau9; University of California– Santa Cruz  
163 Genome Browser), 2145438 complete bacterial plasmids (PLSDB databse, v.2021\_06\_23\_v2), 13705  
164 mitochondrial genomes (NCBI RefSeq database, accessed on Aug 15, 2022), 9443 plastid sequences (NCBI  
165 RefSeq database, accessed on Aug 15, 2022), 6093 UniVec sequences (NCBI RefSeq database, accessed on  
166 Aug 15, 2022), which were considered potential sources of human habitat- or laboratory-associated or  
167 extrachromosomal sequence contaminants for taxonomic classification of microbial metagenomic  
168 sequences<sup>26</sup>. Unmapped paired reads were then subjected to `KrakenUniq v 1.0.4` for taxonomic assignment  
169 using a pre-built database. This database includes complete microbial genomes from RefSeq, comprising



170 46,711 bacterial genomes, 13,011 viral genomes, and 604 archaeal genomes. Additionally, the database  
171 contains 246 eukaryotic pathogens, the UniVec set of standard laboratory vectors, and the GRCh38 human  
172 genome. The abundance of bacteria was evaluated at the genus level, which was deemed more accurate than  
173 the species level.

174 To ensure the removal of potential false positive assignments, the bacterial genera underwent further  
175 filtration based on the following criteria: (1) the genus must contain more than 5 reads; (2) number of  
176 duplicated kmer must be larger than half of assigned read counts; (3) genome coverage must be larger than  
177  $1e-5$ . (1) the genus must have a read count greater than 5; (2) the number of duplicated k-mers must exceed  
178 half of the assigned read counts; and (3) the genome coverage must be larger than  $1e-5$ . Additionally, efforts  
179 were made to distinguish the potential host of the identified genera in order to eliminate non-human-  
180 associated genera that are likely to be contaminants. To accomplish this, information regarding the isolation  
181 sources of bacteria deposited in NCBI (<https://www.ncbi.nlm.nih.gov/genome/browse#!/prokaryotes/>),  
182 IMG/M (<https://img.jgi.doe.gov/cgi-bin/m/main.cgi>), GOLD (<https://gold.jgi.doe.gov/downloads>), and BV-  
183 BRC ([https://www.bv-brc.org/docs/quick\\_references/ftp.html](https://www.bv-brc.org/docs/quick_references/ftp.html)) was gathered. For identified genera not  
184 isolated in these four databases, potential hosts were obtained through a literature search on Google Scholar.  
185 Based on the available host information, the identified genera were classified into three groups: non-human  
186 (genera not isolated from human), human-exclusive (genera exclusively associated with the human host),  
187 and mixed (genera derived from either human or other environments). Non-human-associated genera were  
188 subsequently excluded from further downstream analysis.

### 189 **Microbial analysis**

190 For 16S rRNA sequencing data, feature table, taxonomy, and phylogenetic tree after decontamination were  
191 combined into a Phyloseq object for downstream processing. To estimate alpha diversity and beta diversity,  
192 all samples were rarefied to 2000 sequencing reads. The statistical significance of differences in alpha  
193 diversity was assessed by `stat_compare_means` function in R package “ggpubr”. Difference in microbial  
194 compositions was tested using Permutational multivariate analysis of variance (PERMANOVA).

195 For the bulk RNA-Seq data, the counts of genera were converted to relative abundance for analysis. Due to  
196 the ununiform sequencing depth that would skew the measure of alpha diversity, we did not examine alpha  
197 diversity among RNA-Seq data. Rather, we compared the bacterial read counts per million reads, which  
198 could provide an indication of bacterial load. The Bray-Curtis dissimilarity among the samples was

199 calculated using the `vegdist` function in the R package "vegan" and subjected to Principal Coordinates  
200 Analysis (PCoA). The statistical significance of the findings was evaluated using PERMANOVA analysis  
201 with the `adonis2` function.

202 To evaluate the impact of clinical factors on intratumor microbial communities, a PERMANOVA analysis  
203 with 999 permutations was conducted based on Bray-Curtis dissimilarity. To account for multiple  
204 comparisons, all P-values were adjusted using the false discovery rate (FDR) method. To explore the  
205 relationship between the overall microbial community and overall survival or progression-free survival,  
206 dimensionality reduction was employed to reduce the complexity of the microbial data. Principal Component  
207 Analysis (PCA) was performed using the `PCA` function in the "FactoMineR" R package. The first five  
208 principal components (PCs) of the intratumor microbiome PCA were retained to represent the overall  
209 intratumor microbiome. Cox proportional hazard regression models were employed to examine the  
210 association between each PC and overall survival or progression-free survival. This analysis was conducted  
211 using the `coxph` function in the "survival" package. P-values were adjusted for multiple comparisons using  
212 FDR methods.

### 213 **Identifying diagnosis-related microbiome**

214 For differential abundance testing between tumour and normal tissues in ccRCC, we used relative abundance  
215 and counts per million reads (CPM) respectively. We performed Wilcoxon rank-sum tests for each feature  
216 in genus level, and corrected the resulting p-values with the BH method. To exclude the bias caused by the  
217 sample number imbalance, we incorporated only the matched specimen and finally got 24 pairs in Huashan  
218 cohort, 10 pairs in GSE102101 (Cohort 3), 11 pairs in GSE126964 (Cohort 4), 13 pairs in GSE151419  
219 (Cohort 5).

220 We also used the Random Forest algorithm to further identify the potential features distinguishing the paired  
221 samples using `randomForest` function in the R package "randomForest"<sup>27</sup>. Ten-fold cross-validation and  
222 five repetitions were adopted to help select a specific number of features, whose importance were measured  
223 by accuracy and Gini index.

### 224 **Identifying prognosis-related microbiome**

225 Difference in microbial compositions was first tested between population with long term survival (LTS) and  
226 short term survival (STS). Due to the inconsistent following months, we used the median survival time in  
227 each cohort as the cutoff. Permutational multivariate analysis of variance (PERMANOVA) was used for

228 testing difference in microbial compositions as above mentioned.

229 Univariate cox was performed to identify the genera whose abundance associated with overall survival and  
230 progression free survival. The HR (Hazard Ratio) $>1$  indicated that the feature was a risk factor for the  
231 prognosis, while HR $<1$  indicated that the protect factor. A cluster of genera were preliminarily screened as  
232 the input for the least absolute shrinkage and selection operator (LASSO) to exclude the features with  
233 potential multi-collinearity. The glmnet function in the R package "glmnet"<sup>28</sup> was used and the family was  
234 set as "cox" while the other parameters were set default. Finally, we constructed the cox model using coxph  
235 function in the R package "survival". To fit the model more reasonably, we took the stepwise regression  
236 method to help select a formula-based model by Akaike information criterion (AIC). The OS-related risk  
237 cox model consist of 7 genera, including Abiotrophia, Actinomyces, Bifidobacterium, Dolosigranulum,  
238 Faecalibacterium, Kocuria, and Prevotella. The PFS-related risk cox model contained 13 genera, including  
239 Acinetobacter, Brachybacterium, Exiguobacterium, Faecalibacterium, Finegoldia, Haemophilus, Kocuria,  
240 Lactococcus, Moraxella, Porphyromonas, Prevotella, Rhodococcus, Rothia. The genera with coef $>0$  in the  
241 models were considered risk factors, while those with coef $<0$  were considered protect factors. Kaplan-Meier  
242 survival curves were plotted to report the association between the survival probability and the abundance of  
243 specific genera. The strategy for grouping included dichotomization of abundance measured by CPM and  
244 the presence or not. The significance was examined by log-rank test and two stage hazard rate comparison.  
245 Combined with the clinical covariate such as sex, age, tumor stage and grade, the risk score was tested using  
246 univariate and multivariate cox to determine whether our risk score of microbial features could acted as an  
247 independent prognostic factor.

248 We attempted to determine the centrality among the genera involved in the cox model and to find the hub  
249 genera. The estimateNetwork function in the R package "bootnet"<sup>29</sup> as used and the correlation between the  
250 features were visualized with the network plot. The influence of each genus was also measured by the indexes  
251 including "Strength", "Closeness", "Betweenness" and "ExpectedInfluence".

## 252 **Mapping interaction between genera and host gene**

253 We previously got the gene expression of 6 cohorts. To filter genes non-related to protein coding, we mapped  
254 the gene list to the human genome profile named 'Homo\_sapiens.GRCh38.109.chr.gtf.gz' downloaded from  
255 the ENSEMBL website (<http://asia.ensembl.org/index.html>) and 19142 genes finally remained. The gene  
256 expression of TCGA was downloaded from the GDC portal (<https://portal.gdc.cancer.gov/>) and the data

257 format was transformed to TPM.

258 To figure out the molecular change, especially the signaling pathway differentiation between the sub-group  
259 stratified by the risk score determined by selected microbial features in cox model, we performed the gene  
260 set enrichment analysis (GSEA). We used the GSEA function in the R package “clusterProfiler”<sup>30</sup>, and the  
261 KEGG, PID and REACTOME database were all included using R package “msigdb”<sup>31</sup>. The p-values were  
262 corrected with the BH method.

263 We took the mantel test to characterize the correlation between interest genera and interest molecular  
264 pathways. The mantel\_test function in the R package “linkET”<sup>32</sup> (ref) was used. We dichotomized the genera  
265 into two clusters labeled as risk genera and protect genera. To score the immune related function, the single-  
266 sample gene set enrichment analysis (ssGSEA) method in the R package “GSVA”<sup>33</sup> (ref) was used. The  
267 immune cell infiltration was assessed by the quantiseq method using deconvolve function in the R package  
268 “IOBR”<sup>34</sup>. As there were 15 patients who received the nivolumab immunotherapy and were recorded the  
269 objective response rate in the EGAD00001006029 (Cohort 2), we compared the differential genera between  
270 two groups, that were CB and NCB, using the Chi-Squared test. The prediction ability was adjudged by the  
271 area under curve (AUC).

272 To macroscopically evaluate the association between tumor microbiome composition and host gene  
273 expression, we performed Procrustes analysis. BC dissimilarity was calculated and then the nonmetric  
274 multidimensional scaling (NMDS) was used for dimension reduction. The reduced two dimensions or axes  
275 was input for the rotations and statistical testing in Procrustes analysis. Furthermore, we took the sparse CCA  
276 to identify group level correlations between paired host gene expression and microbiome data using the CCA  
277 function in the R package “PMA”<sup>35</sup>. The parameters were set as default. We processed the data before the  
278 analysis. The genus whose relative abundance was higher than 0.001 in at least 10% samples were kept, and  
279 the data was transformed to the centered log ratio (CLR) format for downstream analysis. We kept the genes  
280 whose expression was greater than 0 in half of the samples and then filtered out genes with low variance,  
281 using 25% quantile of variance across samples in each disease cohort as cut-off. These filtering resulted in  
282 a unique microbiome abundance matrix and host gene expression matrix per cohort for downstream analysis,  
283 including 12477 gene × 54 taxa in the EGAD00001000597 cohort, 11817 gene × 28 taxa in the  
284 EGAD00001006029 cohort, 12633 gene × 26 taxa in the GSE126964 cohort, 11406 gene × 26 taxa in the  
285 GSE151419 cohort, and 11492 gene × 60 taxa in the Renji cohort. As the number of tumor samples in

286 GSE102101 was small, we didn't performed sparse CCA in this cohort. After the sparse CCA, we got paired  
287 genus and genes clusters with significant correlation, and they were classified into a component. The genes  
288 in each component were implemented with pathway enrichment analysis. The significance was determined  
289 by Fisher's exact test and BH method used for adjustment.

### 290 **Statistical analysis**

291 All data analyses were conducted via RStudio software unless otherwise specified. Visualizations were  
292 performed using ggplot2 R package. Two group comparisons were done using Wilcoxon rank-sum test.  
293 Spearman's correlations were calculated using cor.test function. The heatmap was created using Heatmap in  
294 "ComplexHeatmap" R package. In this paper, we used the following notation to indicate the significance  
295 levels of P-values: NS ( $P > 0.05$ ),  $*0.05 < P < 0.01$ ,  $**0.01 < P < 0.001$ , and  $*** P < 0.001$ .

### 296 **Transmission Electron Microscopy (EM)**

297 A total of 20 ccRCC tissue blocks were subject to EM. Fresh tissues were carefully handled immediately  
298 after surgical removal. Blocks sliced 1mm<sup>3</sup> in size were placed in a culture dish containing an electron  
299 microscope fixation solution. Samples were rinsed in 0.1M phosphate buffer (PB, pH 7.4). Samples were  
300 then placed at room temperature for 2 hours using 1% osmium tetroxide prepared in 0.1M phosphate buffer  
301 (PB, pH 7.4). Gradual dehydration was applied, and infiltration was conducted in a mixture of propylene  
302 oxide and Epon 812 resin (1:1) at 37°C overnight. Samples were inserted into an embedding mold filled with  
303 pure Epon 812 resin. The embedding mold underwent polymerization in a 60°C oven for 48 hours. Ultrathin  
304 sections (70nm) were cut from resin blocks using an ultramicrotome and placed on 200 mesh Formvar-  
305 coated copper grids. Copper grids with sections were stained in a 2% uranyl acetate-saturated alcoholic  
306 solution for 15 minutes. Following three rinses with ultrapure water, sections were stained with a lead citrate  
307 solution for 10 minutes. Copper grid sections were air-dried at room temperature overnight in a copper grid  
308 box. The grids were observed under a transmission electron microscope (HITACHI, HT7800).

### 309 **16S rRNA staining**

310 We performed 16S rRNA staining in 178 samples mounted on a tissue microarray (TMA) chip from the  
311 Huashan cohort with an established protocol reported by our group previously<sup>19</sup>. Briefly, thorough  
312 sterilization of hood, blades, and relevant instruments was carried out. Deparaffinized sections were  
313 dehydrated, and protease K was applied at room temperature. 100 μM of EUB338-cy5 probes (sequence: 5'-  
314 GCTGCCTCCCGTAGGAGT-3') diluted in 1 μM working solution were applied and samples were

315 finalized with DAPI (1:500) staining.

316

317

## 318 **RESULTS**

### 319 **ccRCC has low-biomass and most ITB are contaminants**

320 As most cohorts in this study were sequenced by bulk RNA-seq, we applied a tailored  
321 decontamination algorithm (**Fig 2A**). Analysis of these datasets revealed diverse bacteria  
322 present in ccRCC samples (**Fig S1**). Raw ITB reads took up  $\sim (1/2.00E-06)$  of total sequencing  
323 reads (**Fig S2A**) and showed a positive correlation with total reads (**Fig S2B**). 327 out of 545  
324 genera survived after decontamination (**Fig S2C**). Our passes not only managed to filter out  
325 nonhuman reads (**Fig S2D**) but also showed an increase in proportion of common contaminants  
326 after decontamination, indicating that some bacteria, previously accepted as contaminants  
327 could be indwelling in ccRCC (**Fig S2E**). Relative abundance of non-human associated  
328 bacteria dropped consistently in all cohorts following our decontamination (**Fig S2F**). Common  
329 genera across cohorts after decontamination remained comparable either grouped by dataset or  
330 by sample (**Fig S3A-D**), whereas similar trend for bacterial read drop was noticed in cancer  
331 and normal tissue, respectively, further authenticating the remaining reads were true ITB in  
332 ccRCC (**Fig S3E-F**). Compositional atlas demonstrated by relative abundance, as expected,  
333 varied drastically across cohorts (**Figure S4A-D**). Despite so, two phyla, Proteobacteria and  
334 Firmicutes were present in all bulk-sequenced cohorts (**Fig S4**) and in scRNA-sequenced  
335 samples (**Fig S5, Table S1**). They were putatively present in diverse cells such as tumor cells  
336 (**Fig S5**). Furthermore, we then applied 16S rRNA-targeted FISH probe and EM imaging to 20  
337 ccRCC tissue blocks, validating ITB existence in ccRCC (**Fig 2B-C**). We also attempted to  
338 culture 5 tissue blocks in aerobic and anaerobic conditions, but no bacterial growth was noted,  
339 supporting low biomass feature of ccRCC (data not shown). We then cross-referenced top-20  
340 abundant genera in all cohorts and found 11 genera were present in  $\geq 5$  cohorts (**Fig 2D, Fig**  
341 **S5B, Table S2**). Interestingly, three genera including *Cutibacterium* were also present in  
342 TCGA cohort processed by both approaches (**Fig S5C**). Here, we concluded ccRCC harbored

343 a low biomass of ITB and identified presence and composition of ITB which was possibly  
344 extracellular in ccRCC.

### 345 **ITB does not differ between adjacent normal and cancer tissue in ccRCC**

346 Using decontaminated reads (**Table S3**), we next probed clinical associations of ITB in three  
347 profiles: putative ITB load, ITB signature and individual ITB feature(s). Putative ITB load did  
348 not differ between paired normal and cancer tissue in all cohorts (**Fig 2E, Fig S6A**). Whereas  
349 cohorts that underwent RNA-seq could not be processed for alpha-diversity, we did not observe  
350 a difference in alpha-diversity in the Huashan cohort (**Fig 2F, Fig S6B-C**). Surprisingly, no  
351 differences in beta-diversity between normal and cancer tissue were observed in all cohorts  
352 (**Fig 2G, Fig S6D**). The only exception was TCGA\_P cohort, which was challenged for its  
353 overinflated ITB reads (**Fig S6E**) and the alleged corrected version, TCGA\_S cohort, again  
354 showed no difference (**Fig S6F**). We thus pursued whether individual ITB feature(s) was  
355 differentially distributed and was reproducible. Consistent with barren result of comparison  
356 between tumor and normal samples using Wilcoxon Test (**Fig S7A-C**), although the Random  
357 Forest identified 10 candidate differential ITB, this machine learning failed to validate those  
358 features with satisfactory predicting efficacy across the cohorts (**Fig S7D-E**). Again, the 10  
359 features showed inconsistent trends in TCGA\_P cohort and none was significantly different in  
360 TCGA\_S cohort (**Fig S8A-B**). Here we show astonishingly that, contrary to most studies,  
361 differential ITB between adjacent normal and cancer tissue could very well be not present in  
362 ccRCC. Our findings highly suggested that most ITB in ccRCC could be inherent intra-tissue  
363 bacteria residing in kidney and only individual ITB features altered in abundance in cancer  
364 environment, supporting a passenger role of ITB in tumorigenesis stage of the disease.

### 365 **Putative ITB load and risk score predict survival in ccRCC**

366 As expected, ccRCC could not be subtyped by ITB signature based on survival (**Fig S9A-**  
367 **B**). Indeed, ITB signature on the whole was not associated with any major clinicopathological



368 parameters across cohorts (**Fig S10**). However, higher putative loads were associated with  
369 better overall survival (OS) in three cohorts available with OS profile (**Fig 3A**). In TCGA\_S  
370 cohort that encompassed a small sample size, higher loads conferred a numerical better survival  
371 whereas TCGA\_P cohort showed no difference, further questioning data processing in  
372 TCGA\_P cohort (**Fig S11A**). Higher putative loads were solely associated with a better  
373 progression-free survival (PFS) in two cohorts, not reproducible in one of our original cohorts  
374 (cohort 6, Renji) and played a marginally protective role in TCGA\_S cohort (**Fig S11B-C**). We  
375 then identified the compositional differences between patients with long and short survival,  
376 and the genera that coexisted and possessed consistent risk in univariate cox across three  
377 cohorts was used as input for LASSO and Cox model constructing (**Fig S12A-B**). The model  
378 identified a 7-genera ITB risk score predictive of OS in all three cohorts (**Fig 3B, Fig S12C-D,**  
379 **Table S4**) but not in either TCGA cohort (**Fig S12E, Table S5**). Specifically, *Actinomyces* and  
380 *Bifidobacterium* were protective ITB in ccRCC (**Fig S13**). Similar methodology was applied  
381 to PFS probing and a 13-genera risk score was generated (**Fig S14, Table S6**). Higher score  
382 predicted worsened PFS in all cohorts (**Fig 3C**) in which *Exiguobacterium* was a risk factor  
383 and *Rothia* was protective (**Fig S15**). Likewise, the results were not reproducible in either  
384 TCGA\_P or TCGA\_S cohort (**Fig S16, Table S7**). Whereas TCGA\_P was problematic and  
385 TCGA\_S consisted of only WGS samples, we here provided solid evidence that both ITB loads  
386 and features played a role in prognosis. This encouraged us to further investigate host  
387 interactions and treatment response.

#### 388 **ITB is immune-related in ccRCC**

389 Of exploratory interest, we investigated interactions between prognosis-related ITB (**Fig**  
390 **S12D, Fig S14C**) and found *Actinomyces* and *Rothia* being consistent hub ITB features across  
391 cohorts (**Fig S17**). When host interactions were incorporated, we found the immune response  
392 to be the sole consistently enriched program in ITB risk score-stratified patients across all

393 cohorts (**Fig 4A, FigS18A-B, Table S8-11**). In reminiscence of inter-ITB interactions, ITB  
394 genera were associated with antigen presenting cell functions (co-inhibition and co-  
395 stimulation). (**Fig 4B, Fig S18C-D**). The risk score ITB showed in general negative correlation  
396 with pro-cancer immune infiltrates (**Fig 4C**). Specifically, absence of protective ITB  
397 *Actinomyces*, *Rothia* and *Bifidobacterium* were associated with M2 polarization of  
398 macrophages (**Fig 4D, Fig S18E-G**). Nonetheless, those three features were not associated with  
399 response to immune checkpoint inhibition and we identified *Anaerococcus* and  
400 *Corynebacterium* enriched in ccRCC with complete response (CR) to Nivolumab (**Fig 4E-F**).  
401 Lastly, we profiled host interaction using Sparce CCA and three out of five cohorts showed  
402 significant host gene-ITB interaction (**Fig S19A**). Besides immune, we also noted Ribosome  
403 signaling was associated with some microbiota across all cohorts (**Fig S19B-G**). Here, we  
404 showed ITB was associated with host immune response in particular protective ITB that were  
405 associated with decreased immune escape.

406

407 **DISCUSSION**

408 Our study encompassed thus far the largest number of ccRCC cases subject to ITB detection.  
409 In comparison to previous smaller studies<sup>14-17</sup>, several ITB features appeared to be ubiquitously  
410 present at high relative abundance including Proteobacteria and Firmicutes at phylum level and  
411 *Pseudomonas*, *Acinetobacter* and *Staphylococcus* at genus level. Lack of difference in ITB  
412 loads, composition or diversity between normal and cancer tissue was one of our major findings.  
413 Though it was previously reported by Wang et al, we initially considered it to be a result of  
414 lack of any decontamination in their study<sup>16</sup>. Given that ITB features associated with prognosis  
415 were not amongst the top abundant ones, we speculate that ITB could be sporadic and  
416 commensal, not just in ccRCC but also in kidney.

417 Though our 7-genera panel appeared to perform consistently in all cohorts, we are yet to  
418 conclude a pathogenic mechanism regarding a single ITB. Like in genetic association studies,  
419 prognostic panel composed of multiple genes serves as a biomarker simply because none of  
420 the individual gene is statistically powerful enough to generate a reproducible survival  
421 difference and any attribution of a single element should be supported by mechanistic analyses  
422 by cell or animal modeling. Likewise, our ITB panel solely represents the prognostication of  
423 the microbial community. Moreover, our ITB panel was only aggregated at genus rather than  
424 species level, further against overinterpretation.

425 The causation between ITB and renal tumorigenesis remains unknown<sup>36</sup>. Whether those  
426 prognostic ITB are still commensal or, playing driving roles alongside tumor progression  
427 depends on human microbiota-associated murine models (HMAMMs) and microbe-phenotype  
428 triangulation (MPT)<sup>36</sup>. Unfortunately, there are currently no transgenic murine models for  
429 ccRCC<sup>37</sup> and culturomics from animal models is therefore inapplicable<sup>38</sup>. It was surprising that  
430 most prognosis-associated ITB features were protective and so were high putative loads,  
431 contrary to many oncobiome studies. We did not evaluate absolute ITB loads in our own

432 cohorts as loading could not be accurately calculated in transcriptome datasets. However, given  
433 that recent study points out that absolute, rather than relative abundance plays more important  
434 role in microbiome study<sup>39</sup>, and that load is prognostic in nasopharyngeal cancer (NPC)<sup>40</sup>, we  
435 are now setting up a new line to evaluate association between absolute ITB loads and prognosis.

436 We did not put much effort into imaging ITB. For low-biomass cancer, both LPS and FISH  
437 staining could harbor magnified signals from extra-tumor bacterial contamination<sup>41</sup>. We  
438 consider multiple sequencing platforms together with FISH signaling adequate to prove the  
439 existence of ITB. Of note, we did not identify any intracellular bacteria either by EM or scRNA-  
440 seq. This could either be inherent biology of ccRCC or be a result of extreme low biomass of  
441 kidney as we successfully identified ITB in all 10 samples of bladder cancer undergoing  
442 scRNA-seq in another companion project (data not shown).

443 Recent debate over the landmark cancer microbiome study by Poore et al<sup>1</sup> has drawn much  
444 attention in the oncobiome community. In their recent report<sup>25</sup>, Salzberg's team reasoned two  
445 major points that Poore's data should be interpreted with caution, including contamination of  
446 human reads into microbial signaling and overinflation of microbial reads by machine learning.  
447 We owe great thanks to the Salzberg team for providing us KIRC WGS data processed with  
448 their protocol for reproduction and validation of our own findings. Even with the very limited  
449 sample size, our model showed a numerical OS prediction. The reason Salzberg's team did not  
450 process RNA-seq samples was that they considered poly(A)-based transcriptomes could not  
451 capture microbial signals. However, half of our cohorts were poly(A)-based transcriptomic  
452 datasets and we were able to retrieve effective reads therein. In fact, most ITB studies using  
453 scRNA-seq were also able to capture effective reads given the very few cells compared with  
454 bulk sequencing. The "poly(A)" problem in the intratumor microbiome has also been  
455 thoroughly discussed<sup>42,43</sup> and our findings undoubtedly further supported the notion.

456 Last but importantly, we show that certain ITB feature is associated with cancer immunity

457 and response to Nivolumab in ccRCC, in reminiscence of recent trial modulation gut  
458 microbiome in metastatic ccRCC patients receiving Nivolumab plus ipilimumab therapy<sup>44</sup>. The  
459 protective ITB in our findings are closely related to decreased immune escape, e.g., inhibition  
460 of antigen presentation and decreased M2 polarization, both showing pro-inflammatory effects.  
461 Interestingly, ITB with different clinical associations seldom overlap and we have not  
462 identified such an “omnipotent” ITB in ccRCC. Despite so, *Corynebacterium* is of interest as  
463 its abundance ranks top 20 in most cohorts and is associated with Nivolumab response.  
464 *Bifidobacterium* supplement has been shown in trial that augments ICI response in metastatic  
465 ccRCC patients and our findings that intratumor *Bifidobacterium* was protective shed light on  
466 the thus far elusive mechanism of this gut-tumor axis<sup>44</sup>. We did not analyze ITB in ccRCC  
467 patients treated with angiogenesis-targeting therapy though there are a handful of datasets  
468 available, as angiogenesis was not amongst the MAMPs we identified (**Fig S19B**). Given that  
469 combination therapy has become the mainstay of metastatic ccRCC treatment, we are now  
470 setting up an ITB analysis in such samples.

471

## 472 **CONCLUSION**

473 ITB exists in ccRCC. High ITB loads predicted better survival. We also developed a robust  
474 ITB score predictive of prognosis regardless of sequencing tech, sample processing or racial  
475 disparity. Those parameters and panels serve as novel biomarkers for ccRCC.

476

477

## 478 REFERENCES

- 479 1. Oosterlinck B, Ceuleers H, Arras W, et al. Mucin-microbiome signatures shape the tumor  
480 microenvironment in gastric cancer. *Microbiome*. Apr 21 2023;11(1):86. doi:10.1186/s40168-023-01534-w
- 481 2. Mouradov D, Greenfield P, Li S, et al. Oncomicrobial Community Profiling Identifies Clinicomolecular  
482 and Prognostic Subtypes of Colorectal Cancer. *Gastroenterology*. 2023;165(1):104-120.  
483 doi:10.1053/j.gastro.2023.03.205
- 484 3. Sun L, Ke X, Guan A, et al. Intratumoural microbiome can predict the prognosis of hepatocellular  
485 carcinoma after surgery. *Clinical and Translational Medicine*. 2023;13(7)doi:10.1002/ctm2.1331
- 486 4. Sepich-Poore GD, Guccione C, Laplane L, Pradeu T, Curtius K, Knight R. Cancer's second genome:  
487 Microbial cancer diagnostics and redefining clonal evolution as a multispecies process. *BioEssays*.  
488 2022;44(5)doi:10.1002/bies.202100252
- 489 5. Aykut B, Pushalkar S, Chen R, et al. The fungal mycobiome promotes pancreatic oncogenesis via  
490 activation of MBL. *Nature*. 2019;574(7777):264-267. doi:10.1038/s41586-019-1608-2
- 491 6. Nejman D, Livyatan I, Fuks G, et al. The human tumor microbiome is composed of tumor type-specific  
492 intracellular bacteria. *Science*. 2020;368(6494):973-980. doi:10.1126/science.aay9189
- 493 7. Fu A, Yao B, Dong T, et al. Tumor-resident intracellular microbiota promotes metastatic colonization in  
494 breast cancer. *Cell*. 2022;185(8):1356-1372.e26. doi:10.1016/j.cell.2022.02.027
- 495 8. Luo M, Liu Y, Hermida LC, et al. Race is a key determinant of the human intratumor microbiome. *Cancer*  
496 *Cell*. 2022;40(9):901-902. doi:10.1016/j.ccell.2022.08.007
- 497 9. Byrd D, Wolf P. The microbiome as a determinant of racial and ethnic cancer disparities. *Nat Rev Cancer*.  
498 Oct 23 2023;doi:10.1038/s41568-023-00638-7
- 499 10. Galeano Niño JL, Wu H, LaCourse KD, et al. INVADEseq to identify cell-adherent or invasive bacteria and  
500 the associated host transcriptome at single-cell-level resolution. *Nature Protocols*. 2023;doi:10.1038/s41596-  
501 023-00888-7
- 502 11. Dohlman AB, Arguijo Mendoza D, Ding S, et al. The cancer microbiome atlas: a pan-cancer comparative  
503 analysis to distinguish tissue-resident microbiota from contaminants. *Cell Host & Microbe*. 2021;29(2):281-  
504 298.e5. doi:10.1016/j.chom.2020.12.001
- 505 12. Colbert LE, El Alam MB, Wang R, et al. Tumor-resident Lactobacillus iners confer chemoradiation  
506 resistance through lactate-induced metabolic rewiring. *Cancer Cell*. 2023;41(11):1945-1962.e11.  
507 doi:10.1016/j.ccell.2023.09.012
- 508 13. Zhang Z, Gao Q, Ren X, et al. Characterization of intratumor microbiome in cancer immunotherapy. *The*  
509 *Innovation*. 2023;4(5)doi:10.1016/j.xinn.2023.100482
- 510 14. Heidler S, Lusuuardi L, Madersbacher S, Freibauer C. The Microbiome in Benign Renal Tissue and in Renal  
511 Cell Carcinoma. *Urologia Internationalis*. 2020;104(3-4):247-252. doi:10.1159/000504029
- 512 15. Liss MA, Chen Y, Rodriguez R, et al. Microbiome within Primary Tumor Tissue from Renal Cell Carcinoma  
513 May Be Associated with PD-L1 Expression of the Venous Tumor Thrombus. *Advances in Urology*. 2020;2020:1-6.  
514 doi:10.1155/2020/9068068
- 515 16. Wang J, Li X, Wu X, et al. Uncovering the microbiota in renal cell carcinoma tissue using 16S rRNA gene  
516 sequencing. *Journal of Cancer Research and Clinical Oncology*. 2020;147(2):481-491. doi:10.1007/s00432-020-  
517 03462-w
- 518 17. Wheeler C, Yang Y, Spakowicz D, Hoyd R, Li M. 942 The tumor microbiome correlates with response to  
519 immune checkpoint inhibitors in renal cell carcinoma. *Journal for ImmunoTherapy of Cancer*. 2021;9(Suppl  
520 2):A988-A989. doi:10.1136/jitc-2021-SITC2021.942
- 521 18. Amin MB, Greene FL, Edge SB, et al. The Eighth Edition AJCC Cancer Staging Manual: Continuing to build  
522 a bridge from a population-based to a more “personalized” approach to cancer staging. *CA: A Cancer Journal for*  
523 *Clinicians*. 2017;67(2):93-99. doi:10.3322/caac.21388
- 524 19. Sato Y, Yoshizato T, Shiraishi Y, et al. Integrated molecular analysis of clear-cell renal cell carcinoma.  
525 *Nature Genetics*. 2013;45(8):860-867. doi:10.1038/ng.2699
- 526 20. Motzer RJ, Tannir NM, McDermott DF, et al. Nivolumab plus Ipilimumab versus Sunitinib in Advanced  
527 Renal-Cell Carcinoma. *New England Journal of Medicine*. 2018;378(14):1277-1290.  
528 doi:10.1056/NEJMoa1712126
- 529 21. Yao X, Tan J, Lim KJ, et al. VHL Deficiency Drives Enhancer Activation of Oncogenes in Clear Cell Renal  
530 Cell Carcinoma. *Cancer Discov*. Nov 2017;7(11):1284-1305. doi:10.1158/2159-8290.CD-17-0375
- 531 22. Zhao Q, Xue J, Hong B, et al. Transcriptomic characterization and innovative molecular classification of  
532 clear cell renal cell carcinoma in the Chinese population. *Cancer Cell Int*. 2020;20:461. doi:10.1186/s12935-020-

- 533 01552-w  
534 23. Kajdasz A, Majer W, Kluzek K, et al. Identification of RCC Subtype-Specific microRNAs-Meta-Analysis of  
535 High-Throughput RCC Tumor microRNA Expression Data. *Cancers (Basel)*. Feb 1  
536 2021;13(3)doi:10.3390/cancers13030548  
537 24. Poore GD, Kopylova E, Zhu Q, et al. Microbiome analyses of blood and tissues suggest cancer diagnostic  
538 approach. *Nature*. 2020;579(7800):567-574. doi:10.1038/s41586-020-2095-1  
539 25. Gihawi A, Ge Y, Lu J, et al. Major data analysis errors invalidate cancer microbiome findings. *mBio*.  
540 2023;doi:10.1128/mbio.01607-23  
541 26. Nakatsu G, Zhou H, Wu WKK, et al. Alterations in Enteric Virome Are Associated With Colorectal Cancer  
542 and Survival Outcomes. *Gastroenterology*. Aug 2018;155(2):529-541 e5. doi:10.1053/j.gastro.2018.04.018  
543 27. Liaw, A. and Wiener, M. (2002) Classification and Regression by Randomforest. *R News*, 2, 18-22.  
544 <http://CRAN.R-project.org/doc/Rnews/>  
545 28. Friedman J, Hastie T, Tibshirani R. Regularization Paths for Generalized Linear Models via Coordinate  
546 Descent. *Journal of Statistical Software*. 2010;33(1)doi:10.18637/jss.v033.i01  
547 29. Epskamp S, Borsboom D, Fried EI. Estimating psychological networks and their accuracy: A tutorial  
548 paper. *Behav Res Methods*. Feb 2018;50(1):195-212. doi:10.3758/s13428-017-0862-1  
549 30. Wu T, Hu E, Xu S, et al. clusterProfiler 4.0: A universal enrichment tool for interpreting omics data.  
550 *Innovation (Camb)*. Aug 28 2021;2(3):100141. doi:10.1016/j.xinn.2021.100141  
551 31. Dolgalev I (2022). `_msigdb`: MSigDB Gene Sets for Multiple Organisms in a Tidy Data Format\_. R  
552 package version 7.5.1  
553 32. Houyun Huang(2021). `linkET`: Everything is Linkable. R package version 0.0.7.4.  
554 33. Hanzelmann S, Castelo R, Guinney J. GSEA: gene set variation analysis for microarray and RNA-seq data.  
555 *BMC Bioinformatics*. Jan 16 2013;14:7. doi:10.1186/1471-2105-14-7  
556 34. Zeng D, Ye Z, Shen R, Xiong Y (2023). `_IOBR`: Immune Oncology Biological Research\_. R package version  
557 0.99.9.  
558 35. Witten D, Tibshirani R (2020). `_PMA`: Penalized Multivariate Analysis\_. R package version 1.2.1  
559 36. Lv B-M, Quan Y, Zhang H-Y. Causal Inference in Microbiome Medicine: Principles and Applications.  
560 *Trends in Microbiology*. 2021;29(8):736-746. doi:10.1016/j.tim.2021.03.015  
561 37. van der Mijl JC, Laursen KB, Fu L, et al. Novel genetically engineered mouse models for clear cell renal  
562 cell carcinoma. *Scientific Reports*. 2023;13(1)doi:10.1038/s41598-023-35106-7  
563 38. Huang Y, Sheth RU, Zhao S, et al. High-throughput microbial culturomics using automation and machine  
564 learning. *Nat Biotechnol*. Feb 20 2023;doi:10.1038/s41587-023-01674-2  
565 39. Maghini DG, Dvorak M, Dahlen A, Roos M, Kuersten S, Bhatt AS. Quantifying bias introduced by sample  
566 collection in relative and absolute microbiome measurements. *Nature Biotechnology*.  
567 2023;doi:10.1038/s41587-023-01754-3  
568 40. Qiao H, Tan X-R, Li H, et al. Association of Intratumoral Microbiota With Prognosis in Patients With  
569 Nasopharyngeal Carcinoma From 2 Hospitals in China. *JAMA Oncology*.  
570 2022;8(9)doi:10.1001/jamaoncol.2022.2810  
571 41. de Miranda NFCC, Smit VT, van der Ploeg M, Wesseling J, Neefjes J.  
572 2023;doi:10.1101/2023.08.28.555057  
573 42. Ghaddar B, Biswas A, Harris C, et al. Tumor microbiome links cellular programs and immunity in  
574 pancreatic cancer. *Cancer Cell*. 2022;40(10):1240-1253.e5. doi:10.1016/j.ccell.2022.09.009  
575 43. Hu X, Haas JG, Lathe R. The electronic tree of life (eToL): a net of long probes to characterize the  
576 microbiome from RNA-seq data. *BMC Microbiology*. 2022;22(1)doi:10.1186/s12866-022-02671-2  
577 44. Dizman N, Meza L, Bergerot P, et al. Nivolumab plus ipilimumab with or without live bacterial  
578 supplementation in metastatic renal cell carcinoma: a randomized phase 1 trial. *Nature Medicine*.  
579 2022;28(4):704-712. doi:10.1038/s41591-022-01694-6

580

581

582

583 **DECLARATION**

584 **Ethics approval and consent to participate**

585 Informed consent was obtained for all patients and the study was approved by Huashan  
586 Institutional Review Board (HIRB2011-009; HIRB2023-908) and Renji Hospital, School of  
587 Medicine, Shanghai Jiao Tong University (KY2023-049-B).

588 **Data availability statement**

589 Read counts of un-decontaminated ITB have been deposited at China National Center for  
590 Bioinformation (GSA: CRA011414) that are publicly accessible at <https://ngdc.cnbc.ac.cn/gsa>.  
591 Request for TCGA-KIRC data processed by Salzberg et al should be addressed to Prof. Steven  
592 Salzberg ([steven.salzberg@gmail.com](mailto:steven.salzberg@gmail.com)).

593 **Conflict of interest**

594 None.

595 **Authors' contributions**

596 Conceptualization: CF, WZ, YxL, HJ; Methodology: CF, LT, YL, DZ, YxL; Validation: LT,  
597 YL, DZ, HJ; Investigation: CF, LT, YL, DZ, RZ, YS, TG; Original Draft: CF, YL, YC

598 **Acknowledgments**

599 This study was sponsored in part by the National Natural Science Foundation of China  
600 (Grant No. 81874123 and 82273248). We owe great thanks to the Salzberg team for sharing  
601 their data and grant for our use for publication. This study makes use of data generated by the  
602 Department of Pathology and Tumor Biology, Kyoto University, and Dr. Seishi Ogawa was  
603 highly appreciated. We acknowledge Bristol-Myers Squibb Company (BMS) as the source of  
604 the EGAD00001006029 cohort data.

605



606 **Figure legends**

607 **Figure 1. Study Design**

608 **Figure 2. The presence of intratumor bacteria in ccRCC**

609 (A) Flowchart illustrating the process of analyzing bulk RNA-seq data to identify intratumor  
610 bacteria. The analysis involves using bulk RNA-seq data from normal and tumor tissues. To  
611 track potential microbial sources, source annotations from bacterial genomes in databases such  
612 as NCBI, IMG/M, GOLD, and BV-BRC, as well as literature search, are retrieved. Bacteria  
613 associated with the human host are retained for constructing the intratumor bacteria matrix. (B)  
614 Representative images of fluorescence in situ hybridization (FISH) staining of 16S rRNA in  
615 tumor tissues of ccRCC. (C) Representative images of the presence of bacteria in the tumor  
616 tissues captured by transmission electron microscopy based on a total of 20 ccRCC tissue  
617 blocks. The red arrow indicates the object. (D) Stacked bar plot showing the proportion of  
618 genera present in at least five cohorts among the seven cohorts. Box plot showing the difference  
619 of (E) putative load (bacterial counts per million reads) and (F) Shannon index between 24  
620 tumor and paired normal samples for comparison in Huashan cohort. The statistically  
621 significant difference was given by paired Wilcoxon rank-sum test. (G) Principal coordinate  
622 analysis (PCoA) for 24 paired tumor and normal samples in Huashan cohort, based on the  
623 Bray–Curtis dissimilarity. The *P* values were tested by Permutational multivariate analysis of  
624 variance (PERMANOVA).

625 **Figure 3. Putative ITB loads and risk score predict survival in ccRCC**

626 Kaplan–Meier curves showing the overall survival probability for Huashan, Cohort 1, and  
627 Cohort 2 stratified by (A) putative loads and (B) risk score. (C) Kaplan–Meier curves showing  
628 the progression-free survival probability for Huashan, Cohort 2, and Cohort 6 stratified by risk  
629 score. *P* values were calculated using an unadjusted Log-Rank test.

630 **Figure 4. ITB is immune-related in ccRCC**

631 (A) The density curves represent the distribution of the immune-related pathways that were  
632 significantly enriched between the two stratified groups using gene set enrichment analysis.  
633 The horizontal axis indicated the NES of the GSEA result. The stratification was the same as  
634 the previous result, that is the overall survival-related risk group in Cohort 1 and 2, and  
635 progression-free survival-related risk group in Cohort 2 and 6 from top to bottom. (B) The  
636 result of the Mantel test showing the interaction between genera community and potential  
637 immune function and the Spearman method was used. The thickness of the curve indicated the  
638 absolute value of the spearman rho, and the significant connection was yellow colored. Each  
639 block represented the correlation among the immune functions, and a redder color meant a  
640 greater rho. (C) Heatmap showing the correlation between specific genus and infiltration scores  
641 of immune cells in Cohort 1, Cohort 2, and Cohort 6. (D) Box plot exhibiting the level of M2  
642 macrophage polarization in the presence or absence of *Actinomyces*, *Rothia*, *Bifidobacterium*  
643 from left to right in Cohort 6. The Wilcoxon Test was used for comparing the relative  
644 abundance between tumor and normal. (E) The heatmap at left showed the relative abundance  
645 of the differential genera in abundance in the patients with clinical benefit (CB) and non-  
646 clinical benefit (NCB) using Chi-Squared Test. The heatmap at the right indicated the mRNA  
647 expression of genes *PDCD1*, *CD274*, and *CTLA4*. (F) The ability of the abundance of  
648 *Anaerococcus* and *Corynebacterium* to predict the clinical benefit was visualized by the  
649 receiver operating characteristic curve and measured using the area under the curve (AUC).  
650  
651

# Figure 1

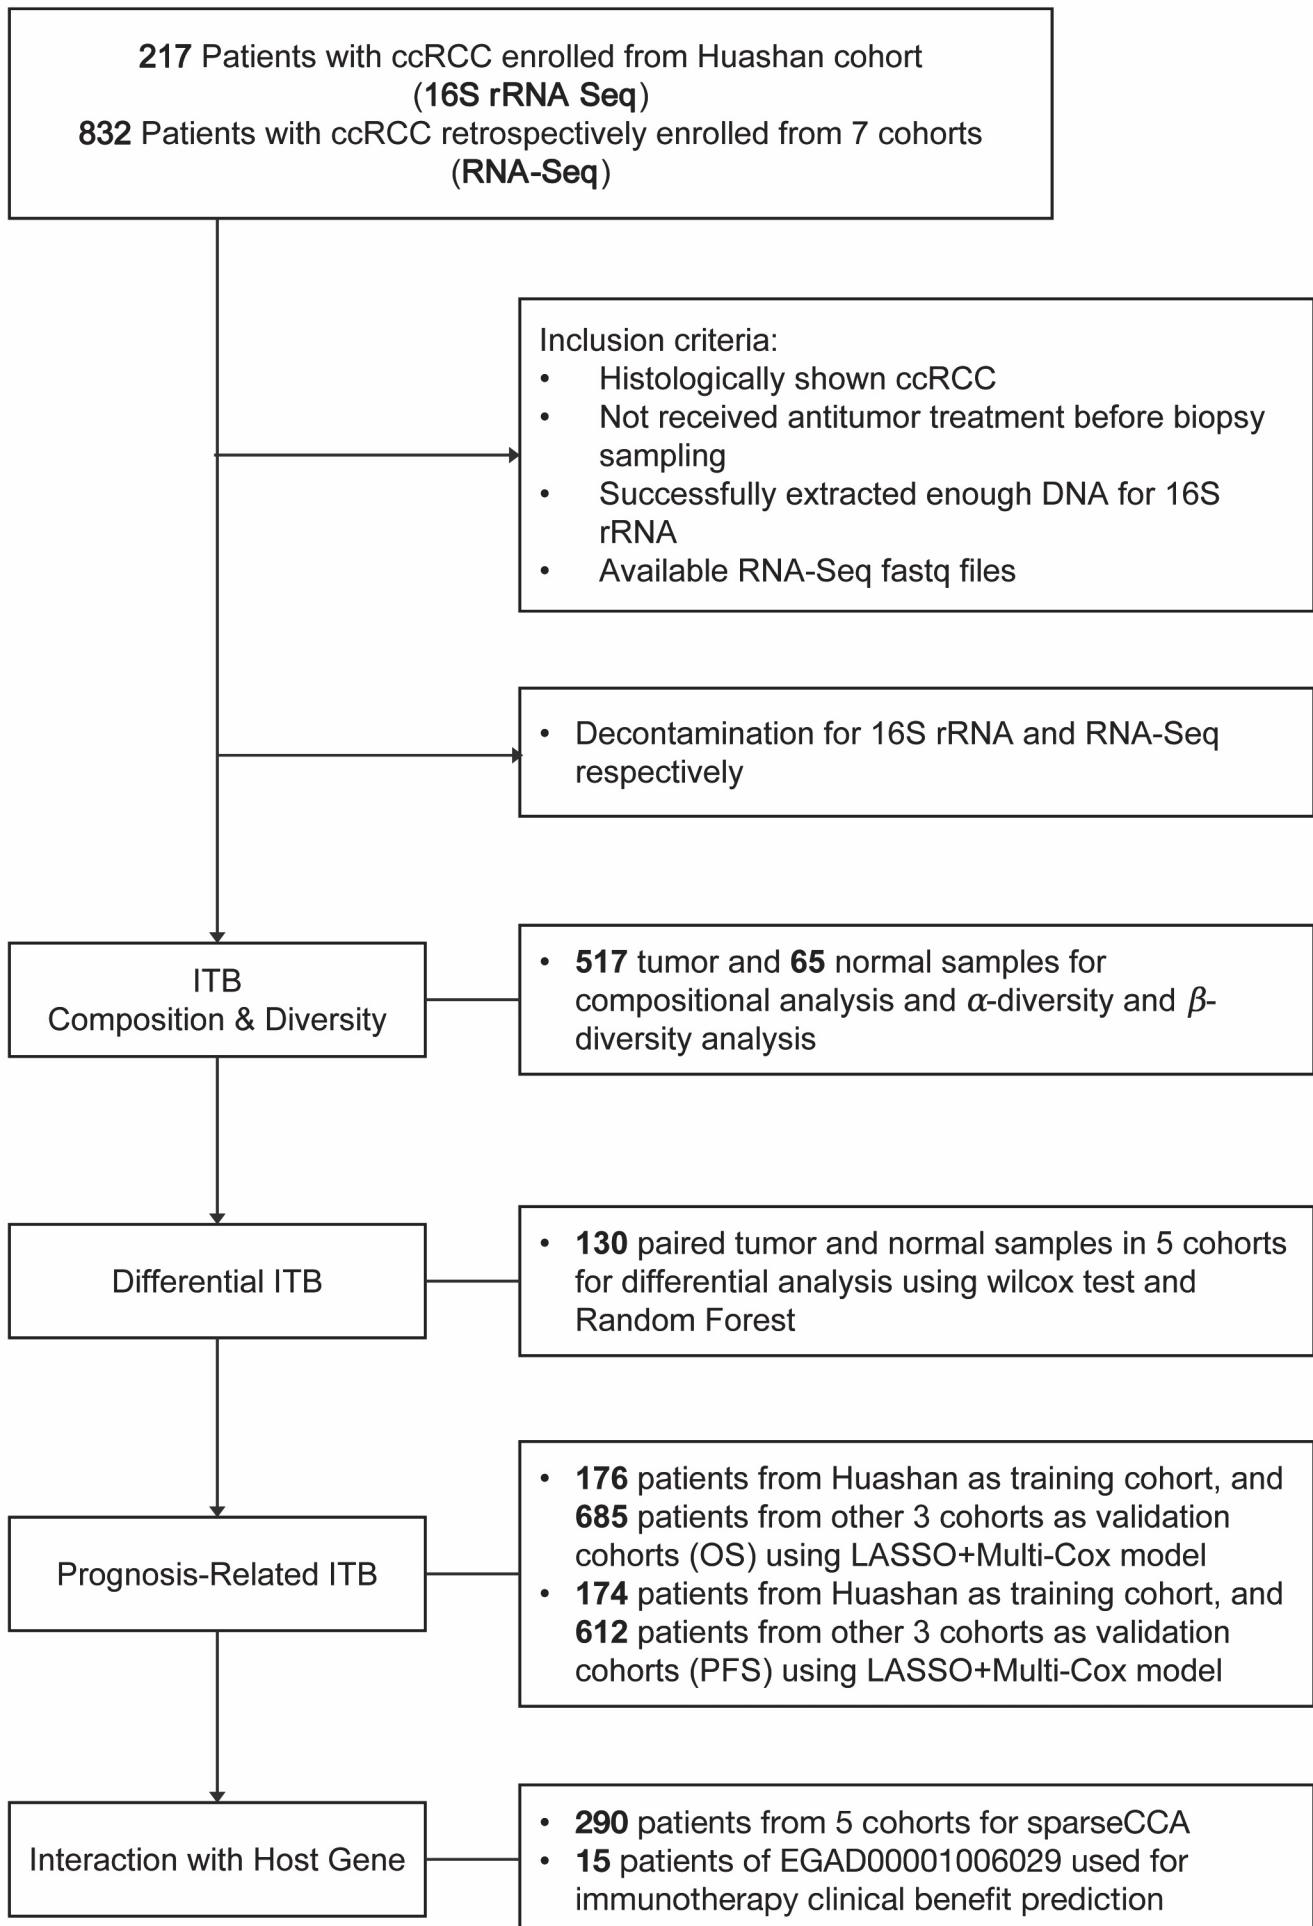

# Figure 2

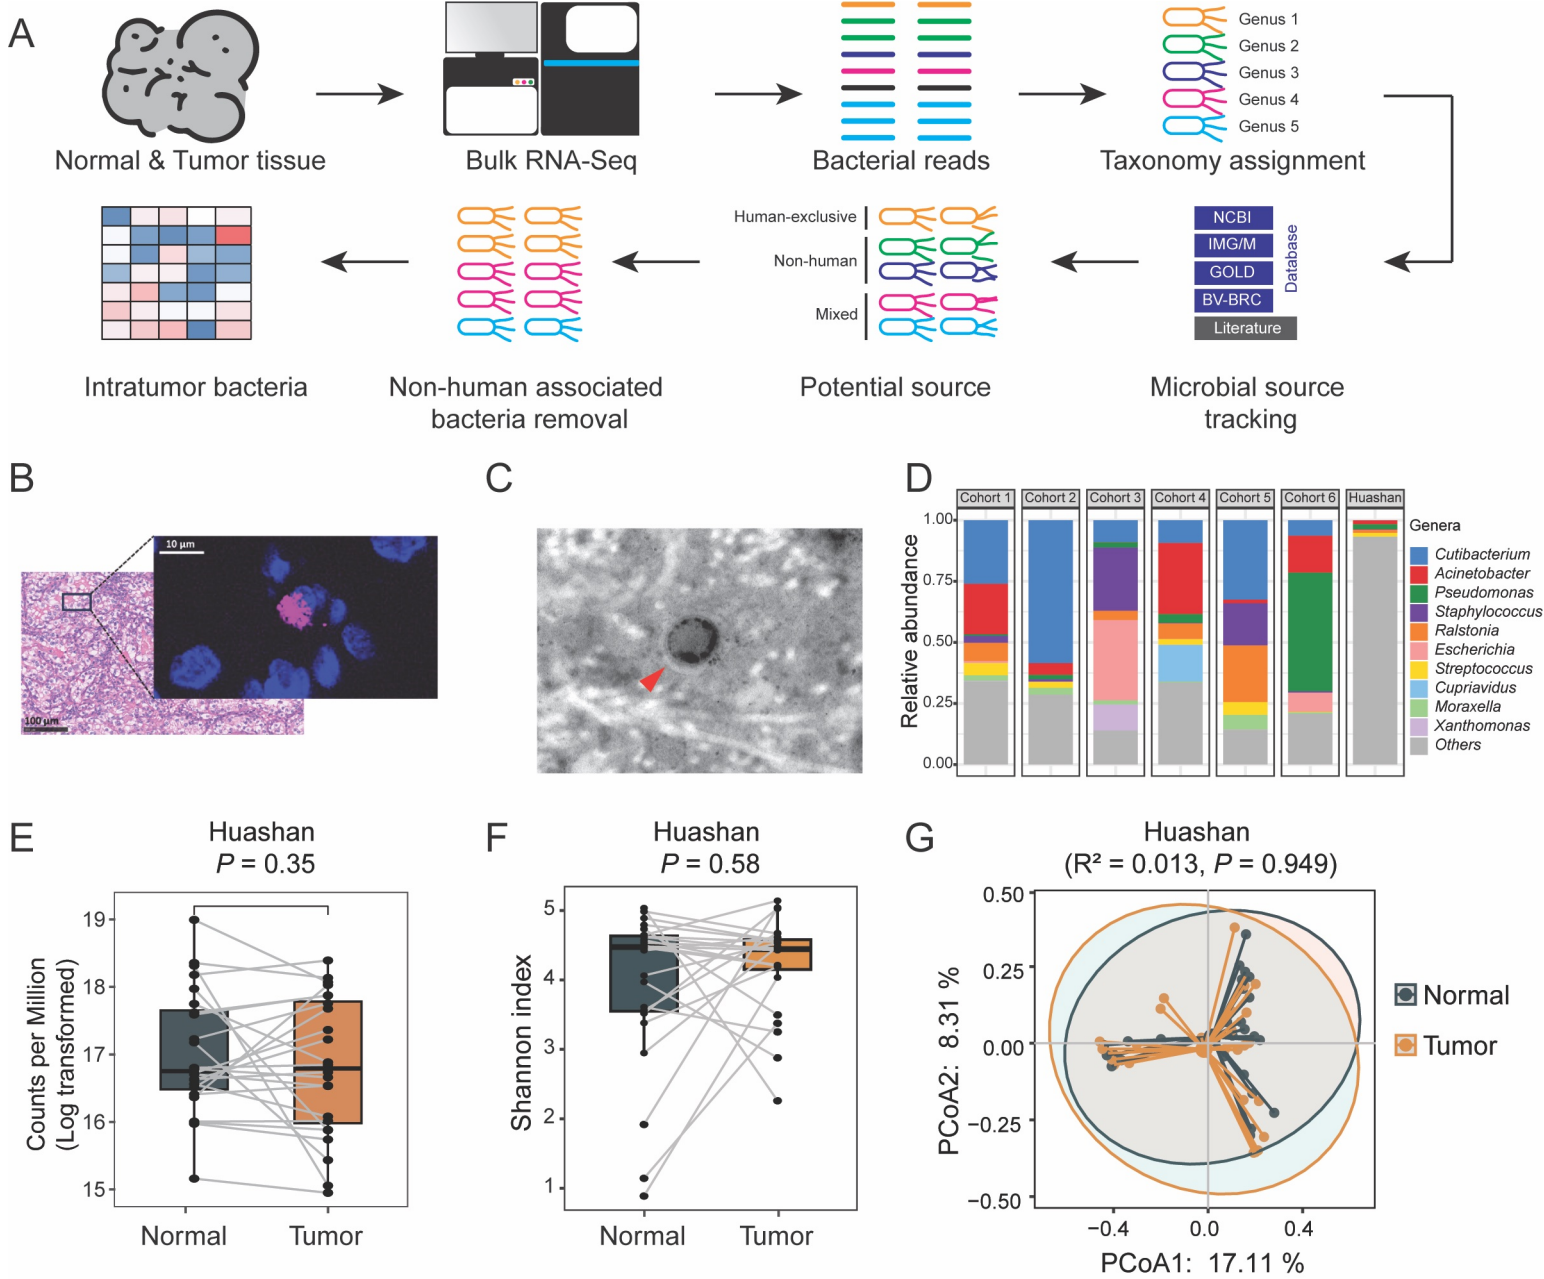

# Figure 3

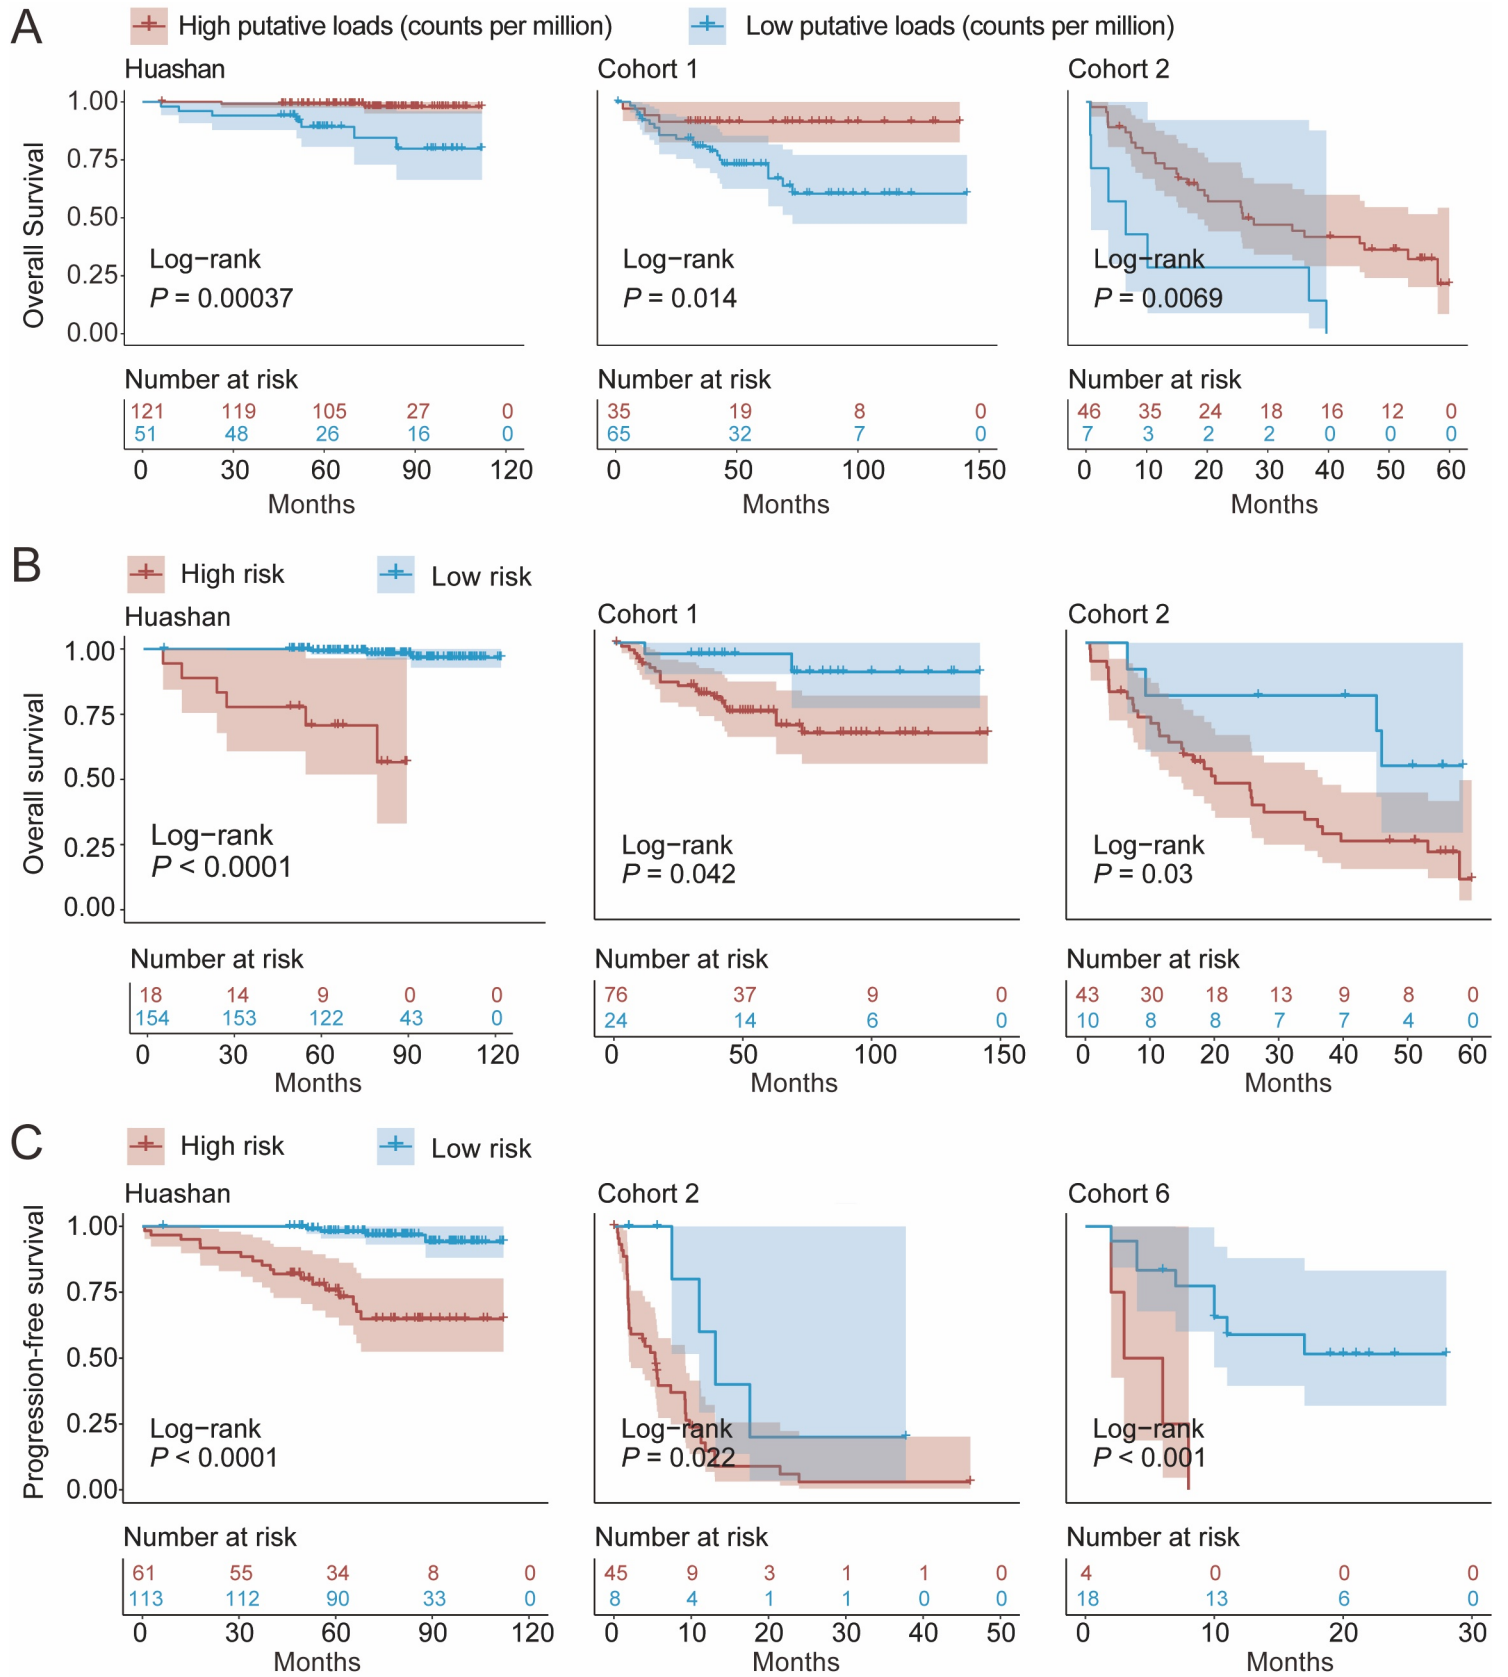

# Figure 4

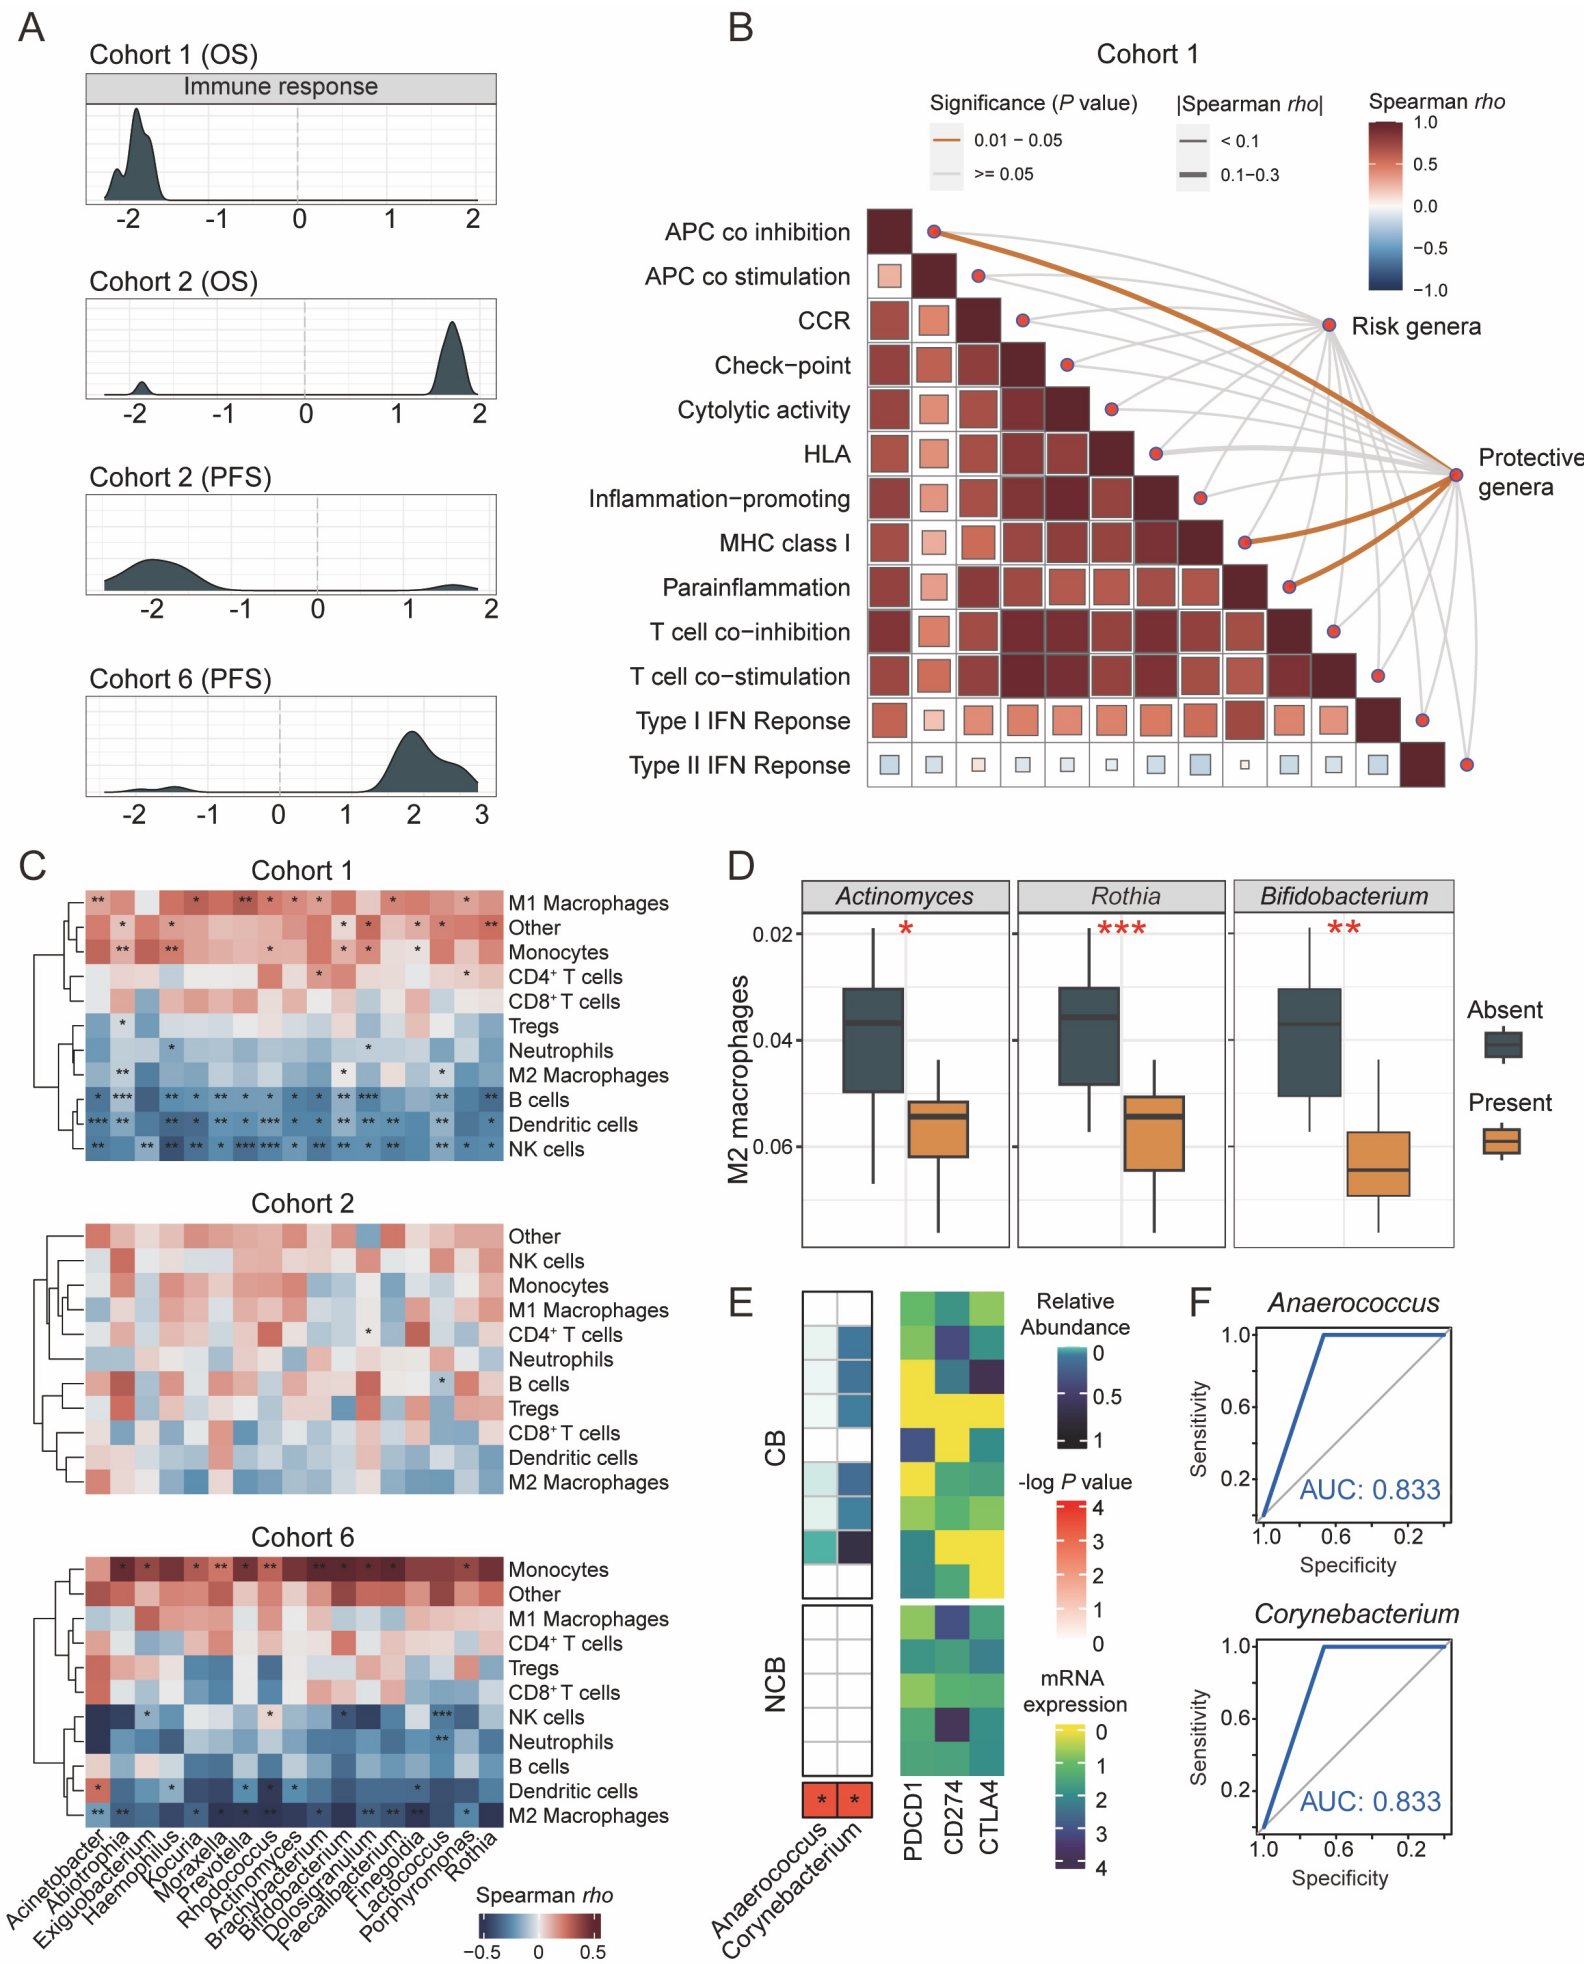

Source: https://medrxiv.org/content/10.1101/2023.12.29.23300629v1.full.pdf
